# Supplementary material for: Structure and Carbon Capture of a Temperate Mixed Forest across Altitudinal Gradients in Northern Mexico
Source: MDPI journal article supplement (doi:10.3390/land13040461), 2024-04-05
Supplement: s1 [file s1]

Table S1: Sampled trees and average values of aboveground biomass and carbon capture according to four altitudinal gradients.

| Gradient 1850-2100 masl      |               |                                               |                                          |
|------------------------------|---------------|-----------------------------------------------|------------------------------------------|
| Species                      | Sampled trees | Aboveground biomass<br>(Mg ha <sup>-1</sup> ) | Carbon storage<br>(Mg ha <sup>-1</sup> ) |
| <i>Arbutus xalapensis</i>    | 8             | 0.15                                          | 0.07                                     |
| <i>Juniperus deppeana</i>    | 27            | 0.23                                          | 0.11                                     |
| <i>Juniperus monosperma</i>  | 4             | 0.03                                          | 0.01                                     |
| <i>Pinus arizonica</i>       | 26            | 0.73                                          | 0.36                                     |
| <i>Pinus ayacahuite</i>      | 3             | 0.16                                          | 0.08                                     |
| <i>Pinus cembroides</i>      | 31            | 0.45                                          | 0.22                                     |
| <i>Pinus durangensis</i>     | 7             | 0.16                                          | 0.08                                     |
| <i>Pinus engelmannii</i>     | 14            | 0.16                                          | 0.08                                     |
| <i>Pinus leiophylla</i>      | 56            | 1.00                                          | 0.49                                     |
| <i>Pinus lumholtzii</i>      | 38            | 0.35                                          | 0.17                                     |
| <i>Pinus oocarpa</i>         | 30            | 0.82                                          | 0.40                                     |
| <i>Quercus arizonica</i>     | 30            | 0.65                                          | 0.29                                     |
| <i>Quercus crassifolia</i>   | 8             | 0.07                                          | 0.03                                     |
| <i>Quercus durifolia</i>     | 21            | 0.34                                          | 0.15                                     |
| <i>Quercus emoryi</i>        | 58            | 0.87                                          | 0.38                                     |
| <i>Quercus fulva</i>         | 30            | 0.38                                          | 0.17                                     |
| <i>Quercus grisea</i>        | 233           | 3.47                                          | 1.54                                     |
| <i>Quercus hypoleucoides</i> | 3             | 0.09                                          | 0.04                                     |
| <i>Quercus jonesii</i>       | 43            | 1.19                                          | 0.53                                     |
| <i>Quercus laeta</i>         | 89            | 1.42                                          | 0.64                                     |
| <i>Quercus oblongifolia</i>  | 42            | 1.82                                          | 0.81                                     |
| <i>Quercus rugosa</i>        | 5             | 0.09                                          | 0.04                                     |
| <i>Quercus sideroxyla</i>    | 34            | 1.34                                          | 0.59                                     |
| <i>Quercus viminea</i>       | 18            | 0.69                                          | 0.31                                     |
| <i>Cupressus arizonica</i>   | 3             | 0.55                                          | 0.27                                     |
| <b>Total</b>                 | <b>861</b>    | <b>17.22</b>                                  | <b>7.85</b>                              |

| Gradient 2101-2350 masl      |               |                                               |                                          |
|------------------------------|---------------|-----------------------------------------------|------------------------------------------|
| Species                      | Sampled trees | Aboveground biomass<br>(Mg ha <sup>-1</sup> ) | Carbon storage<br>(Mg ha <sup>-1</sup> ) |
| <i>Arbutus xalapensis</i>    | 61            | 0.45                                          | 0.21                                     |
| <i>Cupressus lusitanica</i>  | 9             | 0.01                                          | 0.00                                     |
| <i>Fraxinus uhdei</i>        | 17            | 0.03                                          | 0.01                                     |
| <i>Juniperus deppeana</i>    | 207           | 0.57                                          | 0.27                                     |
| <i>Juniperus flaccida</i>    | 1             | 0.00                                          | 0.00                                     |
| <i>Juniperus monosperma</i>  | 4             | 0.01                                          | 0.01                                     |
| <i>Pinus arizonica</i>       | 190           | 1.50                                          | 0.74                                     |
| <i>Pinus ayacahuite</i>      | 115           | 0.82                                          | 0.40                                     |
| <i>Pinus cembroides</i>      | 480           | 1.54                                          | 0.74                                     |
| <i>Pinus durangensis</i>     | 149           | 1.36                                          | 0.66                                     |
| <i>Pinus engelmannii</i>     | 99            | 0.81                                          | 0.40                                     |
| <i>Pinus herrerae</i>        | 2             | 0.01                                          | 0.00                                     |
| <i>Pinus leiophylla</i>      | 319           | 2.37                                          | 1.16                                     |
| <i>Pinus lumholtzii</i>      | 76            | 0.24                                          | 0.11                                     |
| <i>Pinus oocarpa</i>         | 46            | 0.09                                          | 0.05                                     |
| <i>Quercus arizonica</i>     | 113           | 0.61                                          | 0.27                                     |
| <i>Quercus chihuahuensis</i> | 56            | 0.25                                          | 0.09                                     |
| <i>Quercus crassifolia</i>   | 41            | 0.19                                          | 0.09                                     |
| <i>Quercus depressipes</i>   | 8             | 0.04                                          | 0.02                                     |
| <i>Quercus durifolia</i>     | 9             | 0.17                                          | 0.08                                     |
| <i>Quercus emoryi</i>        | 218           | 0.83                                          | 0.37                                     |
| <i>Quercus fulva</i>         | 47            | 0.20                                          | 0.09                                     |
| <i>Quercus greggii</i>       | 5             | 0.05                                          | 0.02                                     |
| <i>Quercus grisea</i>        | 469           | 2.02                                          | 0.90                                     |
| <i>Quercus hypoleucoides</i> | 35            | 0.27                                          | 0.12                                     |
| <i>Quercus jonesii</i>       | 41            | 0.20                                          | 0.09                                     |
| <i>Quercus laeta</i>         | 457           | 1.96                                          | 0.88                                     |
| <i>Quercus laurina</i>       | 18            | 0.13                                          | 0.06                                     |
| <i>Quercus macvaughii</i>    | 73            | 0.37                                          | 0.16                                     |
| <i>Quercus magnoliifolia</i> | 6             | 0.04                                          | 0.02                                     |
| <i>Quercus oblongifolia</i>  | 68            | 0.27                                          | 0.12                                     |
| <i>Quercus potosina</i>      | 56            | 0.27                                          | 0.12                                     |

| Gradient 2101-2350 masl   |               |                                               |                                          |
|---------------------------|---------------|-----------------------------------------------|------------------------------------------|
| Species                   | Sampled trees | Aboveground biomass<br>(Mg ha <sup>-1</sup> ) | Carbon storage<br>(Mg ha <sup>-1</sup> ) |
| <i>Quercus rugosa</i>     | 151           | 1.24                                          | 0.57                                     |
| <i>Quercus sideroxyla</i> | 170           | 1.08                                          | 0.48                                     |
| <i>Quercus tarahumara</i> | 4             | 0.02                                          | 0.01                                     |
| <i>Quercus viminea</i>    | 9             | 0.07                                          | 0.03                                     |
| <b>Total</b>              | <b>3829</b>   | <b>20.11</b>                                  | <b>9.35</b>                              |

| Gradient 2351-2600 masl      |               |                                               |                                          |
|------------------------------|---------------|-----------------------------------------------|------------------------------------------|
| Species                      | Sampled trees | Aboveground biomass<br>(Mg ha <sup>-1</sup> ) | Carbon storage<br>(Mg ha <sup>-1</sup> ) |
| <i>Abies durangensis</i>     | 4             | 0.00                                          | 0.00                                     |
| <i>Arbutus tessellata</i>    | 17            | 0.14                                          | 0.07                                     |
| <i>Arbutus xalapensis</i>    | 134           | 0.95                                          | 0.45                                     |
| <i>Juniperus deppeana</i>    | 249           | 1.09                                          | 0.52                                     |
| <i>Pinus arizonica</i>       | 401           | 4.28                                          | 2.11                                     |
| <i>Pinus ayacahuite</i>      | 244           | 1.75                                          | 0.85                                     |
| <i>Pinus cembroides</i>      | 262           | 0.95                                          | 0.46                                     |
| <i>Pinus durangensis</i>     | 920           | 7.48                                          | 3.66                                     |
| <i>Pinus engelmannii</i>     | 117           | 1.07                                          | 0.53                                     |
| <i>Pinus herrerae</i>        | 37            | 0.41                                          | 0.19                                     |
| <i>Pinus leiophylla</i>      | 219           | 1.58                                          | 0.77                                     |
| <i>Pinus lumholtzii</i>      | 100           | 0.68                                          | 0.33                                     |
| <i>Pinus oocarpa</i>         | 33            | 0.27                                          | 0.13                                     |
| <i>Pinus teocote</i>         | 16            | 0.21                                          | 0.10                                     |
| <i>Pseudotsuga menziesii</i> | 1             | 0.01                                          | 0.01                                     |
| <i>Quercus arizonica</i>     | 56            | 0.20                                          | 0.09                                     |
| <i>Quercus crassifolia</i>   | 137           | 0.62                                          | 0.27                                     |
| <i>Quercus emoryi</i>        | 1             | 0.00                                          | 0.00                                     |
| <i>Quercus fulva</i>         | 219           | 1.66                                          | 0.73                                     |
| <i>Quercus grisea</i>        | 275           | 1.72                                          | 0.76                                     |
| <i>Quercus jonesii</i>       | 10            | 0.03                                          | 0.01                                     |
| <i>Quercus laeta</i>         | 244           | 1.20                                          | 0.54                                     |
| <i>Quercus laurina</i>       | 4             | 0.02                                          | 0.01                                     |
| <i>Quercus macvaughii</i>    | 53            | 0.39                                          | 0.17                                     |
| <i>Quercus oblongifolia</i>  | 41            | 0.26                                          | 0.12                                     |
| <i>Quercus rugosa</i>        | 117           | 1.11                                          | 0.51                                     |
| <i>Quercus sideroxyla</i>    | 245           | 2.04                                          | 0.90                                     |
| <i>Quercus viminea</i>       | 8             | 0.07                                          | 0.03                                     |
| <b>Total</b>                 | <b>4164</b>   | <b>30.21</b>                                  | <b>14.33</b>                             |

| Gradient 2601-2850           |               |                                               |                                          |
|------------------------------|---------------|-----------------------------------------------|------------------------------------------|
| Species                      | Sampled trees | Aboveground biomass<br>(Mg ha <sup>-1</sup> ) | Carbon storage<br>(Mg ha <sup>-1</sup> ) |
| <i>Abies durangensis</i>     | 15            | 0.82                                          | 0.39                                     |
| <i>Arbutus xalapensis</i>    | 17            | 1.41                                          | 0.66                                     |
| <i>Juniperus deppeana</i>    | 13            | 0.79                                          | 0.38                                     |
| <i>Pinus arizonica</i>       | 77            | 12.25                                         | 6.05                                     |
| <i>Pinus ayacahuite</i>      | 93            | 6.37                                          | 3.06                                     |
| <i>Pinus cembroides</i>      | 6             | 0.31                                          | 0.15                                     |
| <i>Pinus durangensis</i>     | 4             | 0.33                                          | 0.16                                     |
| <i>Pinus leiophylla</i>      | 6             | 0.26                                          | 0.13                                     |
| <i>Pinus lumholtzii</i>      | 8             | 0.59                                          | 0.28                                     |
| <i>Populus tremuloides</i>   | 42            | 1.80                                          | 0.81                                     |
| <i>Pseudotsuga menziesii</i> | 8             | 0.62                                          | 0.30                                     |
| <i>Quercus arizonica</i>     | 34            | 1.21                                          | 0.54                                     |
| <i>Quercus fulva</i>         | 8             | 0.23                                          | 0.10                                     |
| <i>Quercus grisea</i>        | 15            | 1.36                                          | 0.60                                     |
| <i>Quercus macvaughii</i>    | 6             | 0.42                                          | 0.18                                     |
| <i>Quercus rugosa</i>        | 6             | 0.62                                          | 0.28                                     |
| <i>Quercus sideroxyla</i>    | 20            | 1.67                                          | 0.74                                     |
| <b>Total</b>                 | <b>378</b>    | <b>31.06</b>                                  | <b>14.82</b>                             |
